# Supplementary material for: Randomized Crossover Comparison of Injection Site Pain with 40 mg/0.4 or 0.8 mL Formulations of Adalimumab in Patients with Rheumatoid Arthritis
Source: PubMed Central journal article supplement — Rheumatol Ther. 2016 Aug 18;3(2):257–70. doi: 10.1007/s40744-016-0041-3 (PMC5127965; doi:10.1007/s40744-016-0041-3), 2016-08-18
Supplement: 40744_2016_41_MOESM1_ESM.pdf [file 40744_2016_41_MOESM1_ESM.pdf]

## Supplementary Text

### Draize scale

The Draize scale has four components. Hemorrhage/petechiae is scored on a scale of 0–5, erythema is scored on a scale of 0–4, edema is scored on a scale of 0–4, and pruritus is scored on a scale of 0–2 (see chart below).

| <b>Score</b> | <b>Hemorrhage/petechiae</b>   | <b>Erythema</b>          | <b>Edema</b>      | <b>Pruritus</b>     |
|--------------|-------------------------------|--------------------------|-------------------|---------------------|
| 0            | No hemorrhage/petechiae       | No erythema              | No edema          | No pruritus         |
| 1            | ≤5 isolated petechiae         | Very slight erythema     | Very slight edema | Occasional pruritus |
| 2            | >5 isolated petechiae         | Well-defined erythema    | Slight edema      | Constant pruritus   |
| 3            | Many petechiae                | Moderate/severe erythema | Moderate edema    |                     |
| 4            | Spots of blood on the surface | Severe erythema          | Severe edema      |                     |
| 5            | Frank bleeding                |                          |                   |                     |

**Supplementary Table 1. Components of the 40 mg/0.8 mL and 40 mg/0.4 mL Adalimumab Formulations**

| <b>40 mg/0.8 mL Formulation</b>                                                                                                                                                                                                                                                                                                                                                        | <b>40 mg/0.4 mL Formulation</b>                                                                                                        |
|----------------------------------------------------------------------------------------------------------------------------------------------------------------------------------------------------------------------------------------------------------------------------------------------------------------------------------------------------------------------------------------|----------------------------------------------------------------------------------------------------------------------------------------|
| <ul style="list-style-type: none"><li>• Adalimumab</li><li>• Mannitol</li><li>• Polysorbate 80</li><li>• Water for injection</li><li>• Citric acid monohydrate</li><li>• Sodium citrate</li><li>• Disodium hydrogen phosphate dehydrate</li><li>• Sodium dihydrogen phosphate dehydrate</li><li>• Sodium chloride</li><li>• Sodium hydroxide added as necessary to adjust pH</li></ul> | <ul style="list-style-type: none"><li>• Adalimumab</li><li>• Mannitol</li><li>• Polysorbate 80</li><li>• Water for injection</li></ul> |

**Supplementary Table 2. Frequency of Needle Pain Immediately After Injection in Patients Who Were Able to Tell the Difference**

|                             | <b>Needle Entry</b> | <b>Solution</b> |
|-----------------------------|---------------------|-----------------|
| <b>Most Pain Caused by:</b> | <b>n (%)</b>        | <b>n (%)</b>    |
| <i>Study 1</i>              |                     |                 |
| 40 mg/0.8 mL formulation    | 14 (25.5)           | 36 (65.5)       |
| 40 mg/0.4 mL formulation    | 24 (43.6)           | 10 (18.2)       |
| <i>Study 2</i>              |                     |                 |
| 40 mg/0.8 mL formulation    | 12 (21.8)           | 43 (78.2)       |
| 40 mg/0.4 mL formulation    | 21 (38.2)           | 8 (14.5)        |

N=55 for the analysis in both Study 1 and Study 2, based on all patients who were able to tell the difference between needle entry and the solution for  $\geq 1$  of the injections.

**Supplementary Table 3. Draize Scale Ratings 10 and 30 Minutes After Injection in Study 1 (cITT Population)**

| Time after injection     | Frequency of Hemorrhage/Petechiae |                       |                       |                          |                         |                   |
|--------------------------|-----------------------------------|-----------------------|-----------------------|--------------------------|-------------------------|-------------------|
|                          | None<br>n (%)                     | ≤5 Petechiae<br>n (%) | >5 Petechiae<br>n (%) | Many petechiae<br>n (%)  | Spots of blood<br>n (%) | Bleeding<br>n (%) |
| 10 minutes               |                                   |                       |                       |                          |                         |                   |
| 40 mg/0.8 mL formulation | 57 (91.9)                         | 5 (8.1)               | 0                     | 0                        | 0                       | 0                 |
| 40 mg/0.4 mL formulation | 60 (96.8)                         | 2 (3.2)               | 0                     | 0                        | 0                       |                   |
| 30 minutes               |                                   |                       |                       |                          |                         |                   |
| 40 mg/0.8 mL formulation | 61 (98.4)                         | 1 (1.6)               | 0                     | 0                        | 0                       | 0                 |
| 40 mg/0.4 mL formulation | 61 (98.4)                         | 1 (1.6)               | 0                     | 0                        | 0                       | 0                 |
| Time after injection     | Frequency of Erythema             |                       |                       |                          |                         |                   |
|                          | None<br>n (%)                     | Very slight<br>n (%)  | Well defined<br>n (%) | Moderate/severe<br>n (%) | Severe<br>n (%)         |                   |
| 10 minutes               |                                   |                       |                       |                          |                         |                   |
| 40 mg/0.8 mL formulation | 43 (69.4)                         | 16 (25.8)             | 3 (4.8)               | 0                        | 0                       |                   |
| 40 mg/0.4 mL formulation | 40 (64.5)                         | 21 (33.9)             | 1 (1.6)               | 0                        | 0                       |                   |
| 30 minutes               |                                   |                       |                       |                          |                         |                   |
| 40 mg/0.8 mL formulation | 47 (75.8)                         | 11 (17.7)             | 4 (6.5)               | 0                        | 0                       |                   |
| 40 mg/0.4 mL formulation | 45 (72.6)                         | 14 (22.6)             | 3 (4.8)               | 0                        | 0                       |                   |
| Time after injection     | Frequency of Edema                |                       |                       |                          |                         |                   |
|                          | None<br>n (%)                     | Very slight<br>n (%)  | Slight<br>n (%)       | Moderate<br>n (%)        | Severe<br>n (%)         |                   |
| 10 minutes               |                                   |                       |                       |                          |                         |                   |
| 40 mg/0.8 mL formulation | 50 (80.6)                         | 10 (16.1)             | 2 (3.2)               | 0                        | 0                       |                   |
| 40 mg/0.4 mL formulation | 52 (83.9)                         | 8 (12.9)              | 2 (3.2)               | 0                        | 0                       |                   |
| 30 minutes               |                                   |                       |                       |                          |                         |                   |
| 40 mg/0.8 mL formulation | 53 (85.5)                         | 6 (9.7)               | 3 (4.8)               | 0                        | 0                       |                   |
| 40 mg/0.4 mL formulation | 53 (85.5)                         | 8 (12.9)              | 1 (1.6)               | 0                        | 0                       |                   |

| Time after injection     | Frequency of Pruritus |                              |                            |
|--------------------------|-----------------------|------------------------------|----------------------------|
|                          | None<br>n (%)         | Occasional pruritus<br>n (%) | Constant pruritus<br>n (%) |
| 10 minutes               |                       |                              |                            |
| 40 mg/0.8 mL formulation | 62 (100)              | 0                            | 0                          |
| 40 mg/0.4 mL formulation | 61 (98.4)             | 1 (1.6)                      | 0                          |
| 30 minutes               |                       |                              |                            |
| 40 mg/0.8 mL formulation | 61 (98.4)             | 1 (1.6)                      | 0                          |
| 40 mg/0.4 mL formulation | 61 (98.4)             | 1 (1.6)                      | 0                          |

cITT=crossover intent to treat.

**Supplementary Table 4. Draize Scale Ratings 10 and 30 Minutes After Injection in Study 2 (cITT Population)**

| <b>Frequency of Hemorrhage/Petechiae</b> |                       |                               |                                  |                                  |                                 |                           |
|------------------------------------------|-----------------------|-------------------------------|----------------------------------|----------------------------------|---------------------------------|---------------------------|
| <b>Time after injection</b>              | <b>None<br/>n (%)</b> | <b>≤5 Petechiae<br/>n (%)</b> | <b>&gt;5 Petechiae<br/>n (%)</b> | <b>Many petechiae<br/>n (%)</b>  | <b>Spots of blood<br/>n (%)</b> | <b>Bleeding<br/>n (%)</b> |
| 10 minutes                               |                       |                               |                                  |                                  |                                 |                           |
| 40 mg/0.8 mL formulation                 | 48 (80.0)             | 12 (20.0)                     | 0                                | 0                                | 0                               | 0                         |
| 40 mg/0.4 mL formulation                 | 54 (90.0)             | 6 (10.0)                      | 0                                | 0                                | 0                               | 0                         |
| 30 minutes                               |                       |                               |                                  |                                  |                                 |                           |
| 40 mg/0.8 mL formulation                 | 49 (81.7)             | 11 (18.3)                     | 0                                | 0                                | 0                               | 0                         |
| 40 mg/0.4 mL formulation                 | 55 (91.7)             | 5 (8.3)                       | 0                                | 0                                | 0                               | 0                         |
| <b>Frequency of Erythema</b>             |                       |                               |                                  |                                  |                                 |                           |
| <b>Time after injection</b>              | <b>None<br/>n (%)</b> | <b>Very slight<br/>n (%)</b>  | <b>Well defined<br/>n (%)</b>    | <b>Moderate/severe<br/>n (%)</b> | <b>Severe<br/>n (%)</b>         |                           |
| 10 minutes                               |                       |                               |                                  |                                  |                                 |                           |
| 40 mg/0.8 mL formulation                 | 30 (50.0)             | 26 (43.3)                     | 4 (6.7)                          | 0                                | 0                               |                           |
| 40 mg/0.4 mL formulation                 | 38 (63.3)             | 15 (25.0)                     | 6 (10.0)                         | 1 (1.7)                          | 0                               |                           |
| 30 minutes                               |                       |                               |                                  |                                  |                                 |                           |
| 40 mg/0.8 mL formulation                 | 36 (60.0)             | 20 (33.3)                     | 4 (6.7)                          | 0                                | 0                               |                           |
| 40 mg/0.4 mL formulation                 | 45 (75.0)             | 9 (15.0)                      | 5 (8.3)                          | 1 (1.7)                          | 0                               |                           |
| <b>Frequency of Edema</b>                |                       |                               |                                  |                                  |                                 |                           |
| <b>Time after injection</b>              | <b>None<br/>n (%)</b> | <b>Very slight<br/>n (%)</b>  | <b>Slight<br/>n (%)</b>          | <b>Moderate<br/>n (%)</b>        | <b>Severe<br/>n (%)</b>         |                           |
| 10 minutes                               |                       |                               |                                  |                                  |                                 |                           |
| 40 mg/0.8 mL formulation                 | 54 (90.0)             | 5 (8.3)                       | 1 (1.7)                          | 0                                | 0                               |                           |
| 40 mg/0.4 mL formulation                 | 56 (93.3)             | 3 (5.0)                       | 1 (1.7)                          | 0                                | 0                               |                           |
| 30 minutes                               |                       |                               |                                  |                                  |                                 |                           |
| 40 mg/0.8 mL formulation                 | 55 (91.7)             | 4 (6.7)                       | 1 (1.7)                          | 0                                | 0                               |                           |
| 40 mg/0.4 mL formulation                 | 57 (95.0)             | 2 (3.3)                       | 1 (1.7)                          | 0                                | 0                               |                           |

| <b>Time after injection</b> | <b>Frequency of Pruritus</b> |                                      |                                    |
|-----------------------------|------------------------------|--------------------------------------|------------------------------------|
|                             | <b>None<br/>n (%)</b>        | <b>Occasional pruritus<br/>n (%)</b> | <b>Constant pruritus<br/>n (%)</b> |
| 10 minutes                  |                              |                                      |                                    |
| 40 mg/0.8 mL formulation    | 59 (98.3)                    | 0                                    | 1 (1.7)                            |
| 40 mg/0.4 mL formulation    | 57 (95.0)                    | 2 (3.3)                              | 1 (1.7)                            |
| 30 minutes                  |                              |                                      |                                    |
| 40 mg/0.8 mL formulation    | 58 (96.7)                    | 1 (1.7)                              | 1 (1.7)                            |
| 40 mg/0.4 mL formulation    | 58 (96.7)                    | 0                                    | 2 (3.3)                            |

cITT=crossover intent to treat.
